# Supplementary material for: Piezoelectric polymer nanofibers for pressure sensors and their applications in human activity monitoring
Source: Royal Society of Chemistry journal article supplement (doi:10.1039/d0ra03293j), 2020-01-01
Supplement: d0ra03293j1.pdf [file d0ra03293j1.pdf]

# Supporting Information

## **Piezoelectric polymer nanofibers for pressure sensors and its applications on human activity monitoring**

Minmin Zhu,<sup>\*a</sup> Soon Siang Chng,<sup>b</sup> Weifan Cai,<sup>b</sup> Chongyang Liu<sup>a</sup> and Zehui Du<sup>a</sup>

<sup>a</sup> Temasek Laboratories, Nanyang Technological University, Research Techno Plaza, 50 Nanyang Drive, Singapore 637553

<sup>b</sup> NOVITAS, School of Electrical and Electronic Engineering, Nanyang Technological University, 50 Nanyang Avenue, Singapore 639798

*\*E-mail address:* mmzhu@ntu.edu.sg (Minmin Zhu)

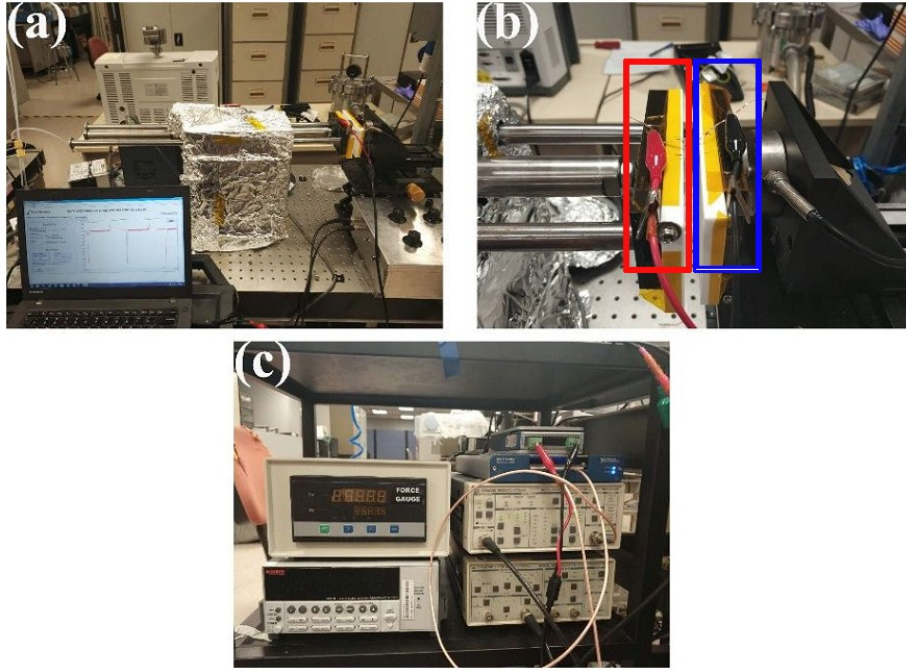

**Figure S1.** Photograph of (a) our experimental setup, (b) force loading platform, and (c) power supply system.

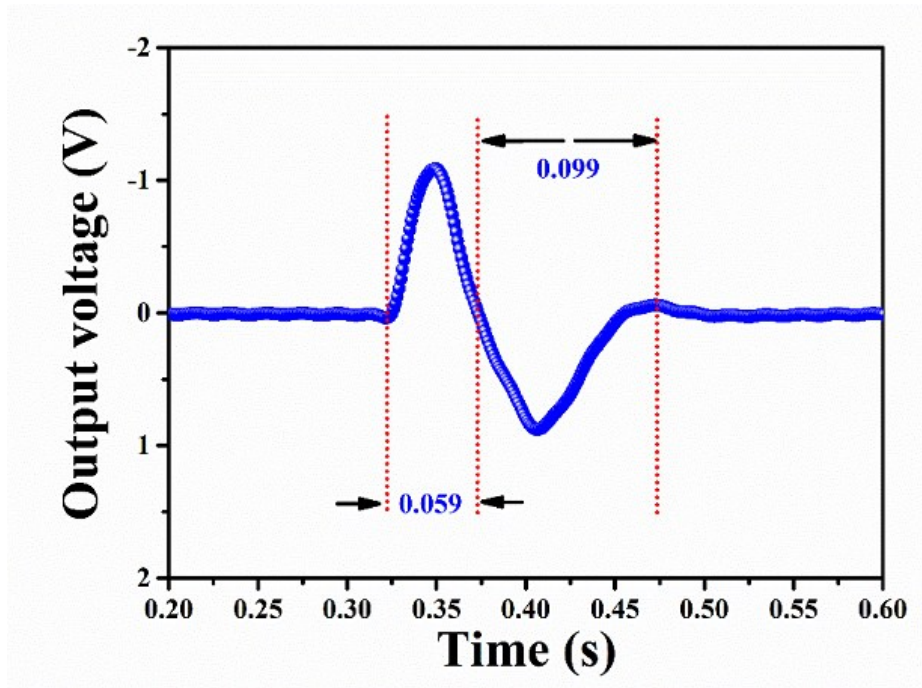

Figure S2. Response time and recovery time of the devices.
